# Supplementary material for: Hybrid organic–inorganic perovskites as microwave radiation switches
Source: Royal Society of Chemistry journal article supplement (doi:10.1039/d2ma00633b), 2022-01-01
Supplement: d2ma00633b1.pdf [file d2ma00633b1.pdf]

Electronic Supplementary Information

## Hybrid organic-inorganic perovskites as microwave radiation switches

Olesia I. Kucheriv,<sup>a</sup> Viktor V. Oliynyk,<sup>b</sup> Volodymyr V. Zagorodnii,<sup>b</sup> Vilen L. Launets,<sup>b</sup> Igor O. Fritsky,<sup>a</sup> and Il'ya A. Gural'skiy<sup>\*a</sup>

<sup>a</sup>Department of Chemistry, Taras Shevchenko National University of Kyiv, 64 Volodymyrska St., Kyiv 01601, Ukraine.

E-mail: illia.guralskyi@univ.kiev.ua

<sup>b</sup>Educational and Scientific Institute of High Technologies, Taras Shevchenko National University of Kyiv, 64 Volodymyrska St., Kyiv 01601, Ukraine

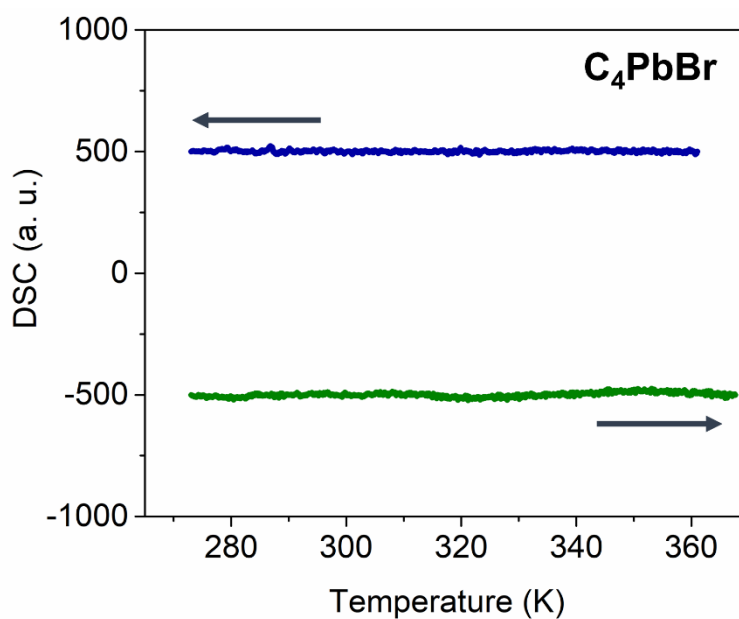

Figure S1. DSC curve of  $C_4PbBr$  showing the absence of phase transition in the studied temperature range.

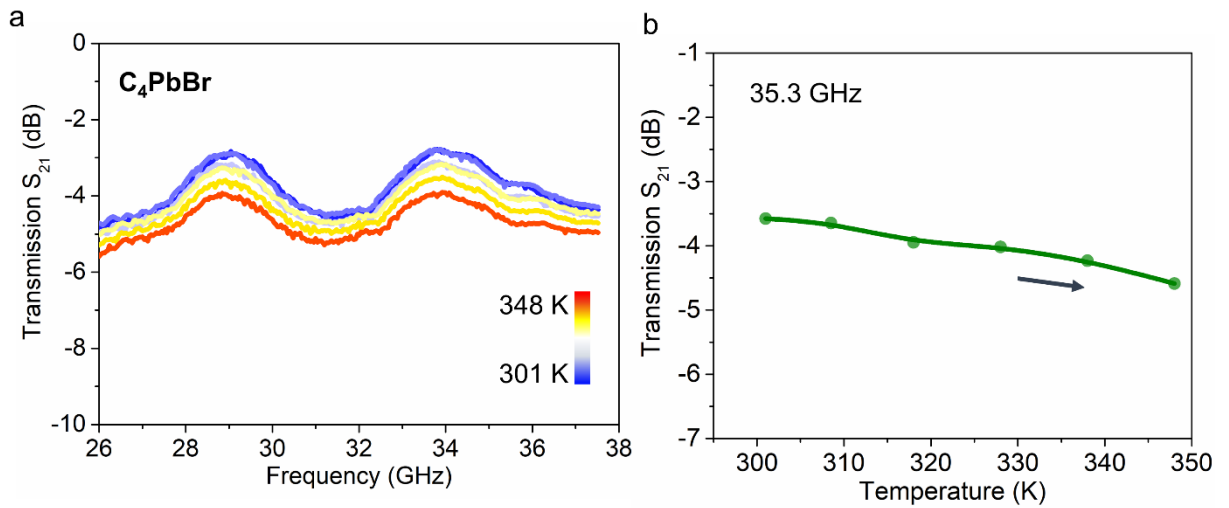

Figure S2. (a) Spectral variation of microwave radiation transmission (dB) for  $C_4PbBr$  with temperature obtained in the matched waveguide at heating. Extracted values of transmission vs. temperature for  $C_4PbBr$  (b) at 35.3 GHz frequency. These curves demonstrate a slight drift of microwave radiation transmission upon heating.

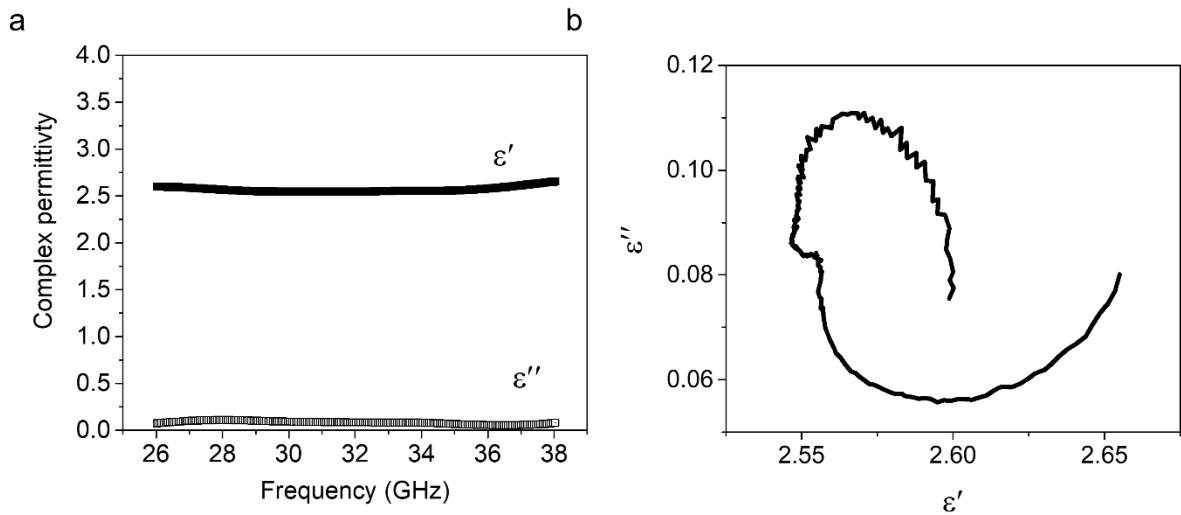

Figure S3. (a) Dependence of complex permittivity ( $\epsilon'$  and  $\epsilon''$ ) of PMMA on frequency. (b) Cole-Cole plots for PMMA in 26 – 38 GHz frequency range.

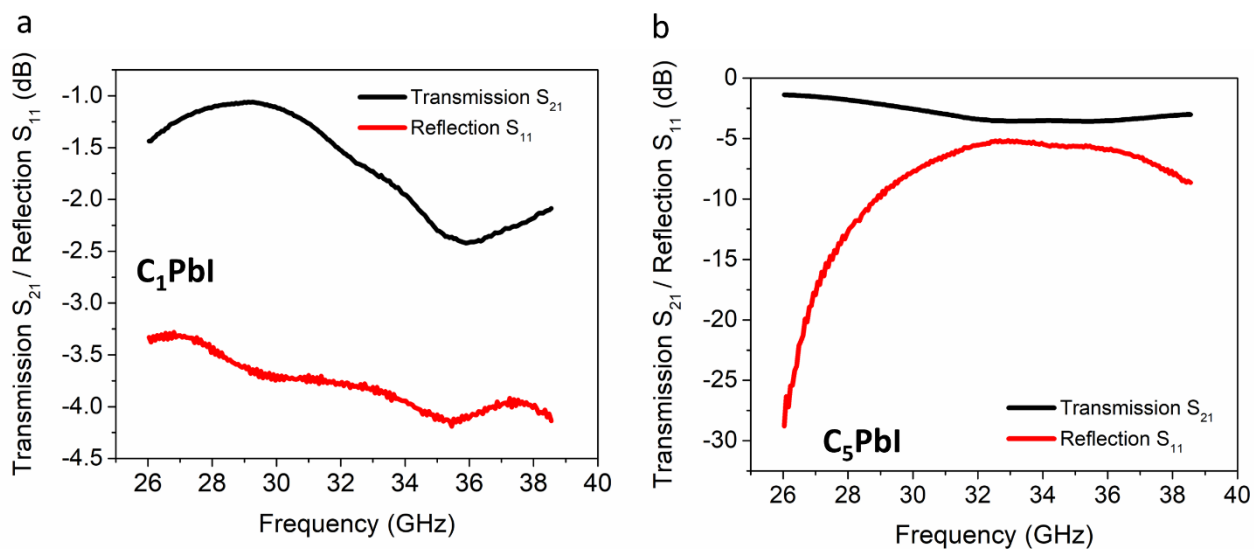

Figure S4. Transmission / reflection spectra of  $C_1PbI$  (a) and  $C_5PbI$  (b), obtained with VNA at room temperature.

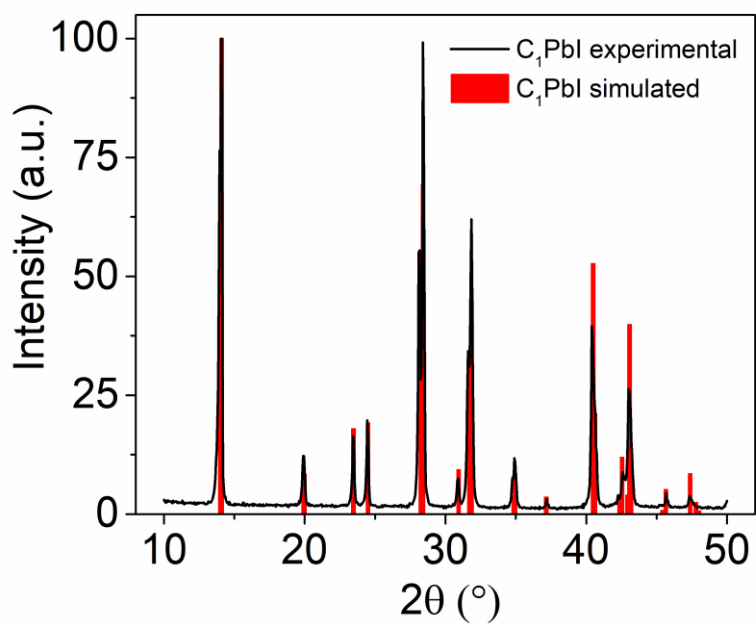

Figure S5. Experimental PXRD pattern of  $C_1PbI$  and a pattern simulated from single crystal structure (295 K).<sup>[1]</sup>

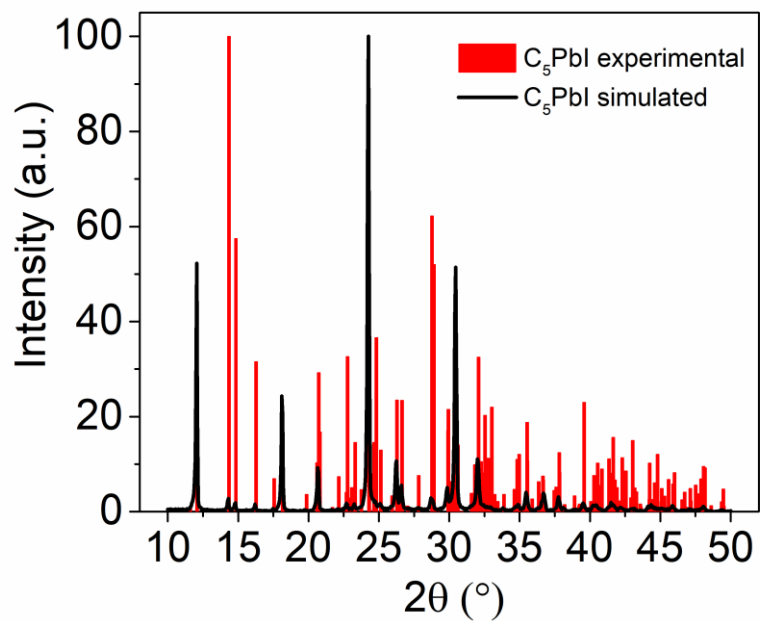

Figure S6. Experimental PXR D pattern of  $C_5PbI$  and a pattern simulated from single crystal structure (293 K).<sup>[2]</sup> Mismatch of peaks intensities is associated with strong preferential orientation in the sample.

References:

- [1] Y. Ren, I. W. H. Oswald, X. Wang, G. T. McCandless, J. Y. Chan, *Cryst. Growth Des.* **2016**, *16*, 2945–2951.
- [2] D. G. Billing, A. Lemmerer, *Acta Crystallogr. Sect. B Struct. Sci.* **2007**, *63*, 735–747.
